# Supplementary material
Source: publisher figshare collection journal article supplement (https://gsajournals.figshare.com/ndownloader/files/12428957)
Supplement: Supplementary file 1 [file 12428957]

>Wild Type
ATGGCGTCGCCCAGCTGCCTGTGGCTCCTGGCCGTCGCCCTCCTGCCGGGGTCCGGCGCTGCCCGGGCGCCCTGGCGTCTGGACCCGGCCGCGCCGCTGCCGCTGGTGATCTGGCATGGGATGGGAGACAGCTGTTGTAATCCCTTAAGCATGGGAGCTATTAAAAAAATGGTTGAGGAGAAAATACCTGGAATTTACGTCTTATCTTTAGAGATTGGGAAGACCCTGATGGAGGATGTGGAGAACAGCTTCTTCTTGAATGTCAATTCCCAAGTAACAACTGTGTGTCAGATTCTTGCTAAGGATCCTAAATTGCATCAAGGCTACAATGCTATGGGATTCTCTCAGGGAGGCCAATTTCTGAGGGCAGTGGCTCAGAGATGCCCATCACCTCCCATGATCAATCTAATCTCGATTGGGGGACAACATCAAG**GTGTTTATGGACTCCCTCGGTGCCCAGGGGAGAGCTCTCACATCTGTGACTTGATCAGAAAAACACTGAATGCTGGGGCTTACAACAAAGCTATTCAAGAACG**CCTGGTGCAAGCAGAGTACTGGCACGACCCCATAAAGGAGGACACGTACCGCAACCACAGCATCTTCCTGGCCGATATTAATCAGGAGCGGGGCGTCAATGAGTCCTACAAGAGAAACCTGATGGCCTTGAAGAAGTTTGTGATGGTGAAATTTCTCAACGATTCCATTGTGGATCCTGTGGACTCTGAGTGGTTTGGATTCTACAGAAGTGGCCAAGCCAAGGAAACCATTCCCTTGCAGGAGACCGCTCTGTACACACAGGACCGCCTGGGGCTAAAGGAAATGGATAATGCAGGACAGCTAGTGTTCCTGGCTGTAGAAGGGGACCATCfTTCAACTGTCTCAGGAATGGTTTTATGCCCACATCATACCCTTCCTTGAGTAA

>Retention of an additional Exon 5 copy
ATGGCGTCGCCCAGCTGCCTGTGGCTCCTGGCCGTCGCCCTCCTGCCGGGGTCCGGCGCTGCCCGGGCGCCCTGGCGTCTGGACCCGGCCGCGCCGCTGCCGCTGGTGATCTGGCATGGGATGGGAGACAGCTGTTGTAATCCCTTAAGCATGGGAGCTATTAAAAAAATGGTTGAGGAGAAAATACCTGGAATTTACGTCTTATCTTTAGAGATTGGGAAGACCCTGATGGAGGATGTGGAGAACAGCTTCTTCTTGAATGTCAATTCCCAAGTAACAACTGTGTGTCAGATTCTTGCTAAGGATCCTAAATTGCATCAAGGCTACAATGCTATGGGATTCTCTCAGGGAGGCCAATTTCTGAGGGCAGTGGCTCAGAGATGCCCATCACCTCCCATGATCAATCTAATCTCGATTGGGGGACAACATCAAG**GTGTTTATGGACTCCCTCGGTGCCCAGGGGAGAGCTCTCACATCTGTGACTTGATCAGAAAAACACTGAATGCTGGGGCTTACAACAAAGCTATTCAAGAACGGTGTTTATGGACTCCCTCGGTGCCCAGGGGAGAGCTCTCACATCTGTGACTTGATCAGAAAAACACTGAATGCTGGGGCTTACAACAAAGCTATTCAAGAACG**CCTGGTGCAAGCAGAGTACTGGCACGACCCCATAAAGGAGGACACGTACCGCAACCACAGCATCTTCCTGGCCGATATTAATCAGGAGCGGGGCGTCAATGAGTCCTACAAGAGAAACCTGATGGCCTTGAAGAAGTTTGTGATGGTGAAATTTCTCAACGATTCCATTGTGGATCCTGTGGACTCTGAGTGGTTTGGATTCTACAGAAGTGGCCAAGCCAAGGAAACCATTCCCTTGCAGGAGACCGCTCTGTACACACAGGACCGCCTGGGGCTAAAGGAAATGGATAATGCAGGACAGCTAGTGTTCCTGGCTGTAGAAGGGGACCATCTTCAACTGTCTCAGGAATGGTTTTATGCCCACATCATACCCTTCCTTGAGTAA

>Retention of an additional Exon 5 copy plus a 166 bp novel exon
ATGGCGTCGCCCAGCTGCCTGTGGCTCCTGGCCGTCGCCCTCCTGCCGGGGTCCGGCGCTGCCCGGGCGCCCTGGCGTCTGGACCCGGCCGCGCCGCTGCCGCTGGTGATCTGGCATGGGATGGGAGACAGCTGTTGTAATCCCTTAAGCATGGGAGCTATTAAAAAAATGGTTGAGGAGAAAATACCTGGAATTTACGTCTTATCTTTAGAGATTGGGAAGACCCTGATGGAGGATGTGGAGAACAGCTTCTTCTTGAATGTCAATTCCCAAGTAACAACTGTGTGTCAGATTCTTGCTAAGGATCCTAAATTGCATCAAGGCTACAATGCTATGGGATTCTCTCAGGGAGGCCAATTTCTGAGGGCAGTGGCTCAGAGATGCCCATCACCTCCCATGATCAATCTAATCTCGATTGGGGGACAACATCAAG**GTGTTTATGGACTCCCTCGGTGCCCAGGGGAGAGCTCTCACATCTGTGACTTGATCAGAAAAACACTGAATGCTGGGGCTTACAACAAAGCTATTCAAGAACGGTGTTTATGGACTCCCTCGGTGCCCAGGGGAGAGCTCTCACATCTGTGACTTGATCAGAAAAACACTGAATGCTGGGGCTTACAACAAAGCTATTCAAGAACG*CCCAGAATGAGAGCAATGAGGCCTAGTACCTGCTAGGCTGATATTTGGTGGACCCGTCTCTGGAAAACCTGACTGGCCCCAGAGAAAAGATCTACAGGTTGATGTTTCAGAGTCCTCCAAGAAATCAGGATTCCTGTGGACCACTGTGAGGTGACGCCCCCAGGAG***CCTGGTGCAAGCAGAGTACTGGCACGACCCCATAAAGGAGGACACGTACCGCAACCACAGCATCTTCCTGGCCGATATTAATCAGGAGCGGGGCGTCAATGAGTCCTACAAGAGAAACCTGATGGCCTTGAAGAAGTTTGTGATGGTGAAATTTCTCAACGATTCCATTGTGGATCCTGTGGACTCTGAGTGGTTTGGATTCTACAGAAGTGGCCAAGCCAAGGAAACCATTCCCTTGCAGGAGACCGCTCTGTACACACAGGACCGCCTGGGGCTAAAGGAAATGGATAATGCAGGACAGCTAGTGTTCCTGGCTGTAGAAGGGGACCATCTTCAACTGTCTCAGGAATGGTTTTATGCCCACATCATACCCTTCCTTGAGTAA

>Retention of an additional Exon 5 copy plus a 141 bp novel exon ATGGCGTCGCCCAGCTGCCTGTGGCTCCTGGCCGTCGCCCTCCTGCCGGGGTCCGGCGCTGCCCGGGCGCCCTGGCGTCTGGACCCGGCCGCGCCGCTGCCGCTGGTGATCTGGCATGGGATGGGAGACAGCTGTTGTAATCCCTTAAGCATGGGAGCTATTAAAAAAATGGTTGAGGAGAAAATACCTGGAATTTACGTCTTATCTTTAGAGATTGGGAAGACCCTGATGGAGGATGTGGAGAACAGCTTCTTCTTGAATGTCAATTCCCAAGTAACAACTGTGTGTCAGATTCTTGCTAAGGATCCTAAATTGCATCAAGGCTACAATGCTATGGGATTCTCTCAGGGAGGCCAATTTCTGAGGGCAGTGGCTCAGAGATGCCCATCACCTCCCATGATCAATCTAATCTCGATTGGGGGACAACATCAAG**GTGTTTATGGACTCCCTCGGTGCCCAGGGGAGAGCTCTCACATCTGTGACTTGATCAGAAAAACACTGAATGCTGGGGCTTACAACAAAGCTATTCAAGAACGGTGTTTATGGACTCCCTCGGTGCCCAGGGGAGAGCTCTCACATCTGTGACTTGATCAGAAAAACACTGAATGCTGGGGCTTACAACAAAGCTATTCAAGAACG*GGTATTTTATTTACTCATGAGAGACACAGAGAGAGAGAGAGAGGCAGAGACACAGGCAGAGAGAGGGAGAAGCAGGCTCCATGCAGGGAGCCCAATGCGGGACTCGATCCCAGGACCCCAGGATCACGCCCTGGGCCGAAG***CCTGGTGCAAGCAGAGTACTGGCACGACCCCATAAAGGAGGACACGTACCGCAACCACAGCATCTTCCTGGCCGATATTAATCAGGAGCGGGGCGTCAATGAGTCCTACAAGAGAAACCTGATGGCCTTGAAGAAGTTTGTGATGGTGAAATTTCTCAACGATTCCATTGTGGATCCTGTGGACTCTGAGTGGTTTGGATTCTACAGAAGTGGCCAAGCCAAGGAAACCATTCCCTTGCAGGAGACCGCTCTGTACACACAGGACCGCCTGGGGCTAAAGGAAATGGATAATGCAGGACAGCTAGTGTTCCTGGCTGTAGAAGGGGACCATCTTCAACTGTCTCAGGAATGGTTTTATGCCCACATCATACCCTTCCTTGAGTAA
